# Supplementary material for: Time Variation in Extrapolation and Anomalies
Source: Atypon-hosted journal article supplement (doi:10.1287/mnsc.2024.06850), 2026-02-19
Supplement: mnsc.2024.06850.sm1.pdf [file mnsc.2024.06850.sm1.pdf]

**Internet Appendix for  
“Time Variation in Extrapolation and Anomalies”**

**Wei He      Zhiwei Su      Yuehan Wang      Jianfeng Yu**

This Internet Appendix provides additional results.

**Figure IA1. Parameter  $b$**

Panel A plots the constructed  $b$  series. The parameter  $b$  is estimated recursively by way of nonlinear least squares from the equation

$$Exp_t = a + b \sum_{i=0}^{59} w_i R_{t-(i+1)\Delta t, t-i\Delta t}, \quad w_i = \frac{\lambda^i}{\sum_{k=0}^{59} \lambda^k}, \quad 0 \leq \lambda < 1,$$

where the extrapolative expectation ( $Exp$ ) is the principal component of two surveys, the Investor Intelligence Survey (II) and the Survey of Individual Investors from the American Association (AA). The stock market return is the quarterly aggregate value-weighted stock market from CRSP. The sample period is from 1992:07 to 2018:06. The shaded bars indicate NBER recessions. Panel B reports the summary statistics of the parameter  $b$ .

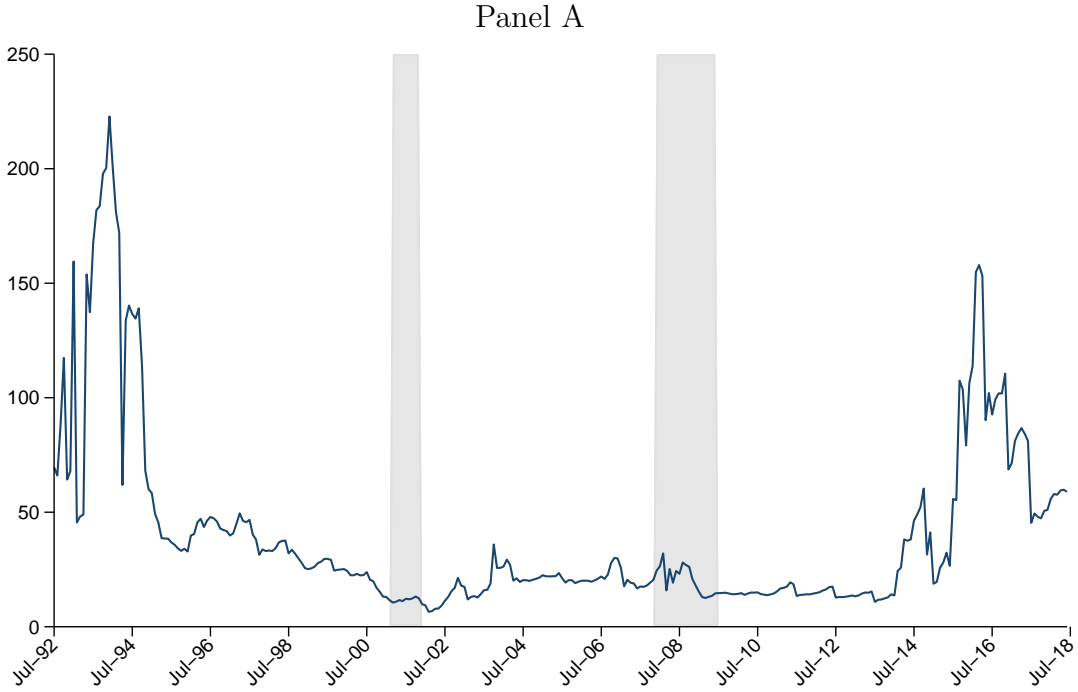

Panel B

| N   | Mean  | Std   | Min  | P5    | P50   | P95    | Max    |
|-----|-------|-------|------|-------|-------|--------|--------|
| 312 | 40.09 | 40.22 | 6.53 | 11.91 | 24.51 | 139.04 | 222.84 |

**Table IA1. DOX and b: predictive regressions**

The table reports estimates of  $\beta$  and  $\gamma$  in the regression  $R_t = \alpha + \beta DOX_{t-1} + \gamma b_{t-1} + \epsilon_t$ , where  $R_t$  is the excess return (in percentages) in month  $t$  on the long leg, the short leg, or the difference and  $b$  is the estimated parameter in the equation  $Exp_t = a + b \sum_{i=0}^{59} w_i R_{t-(i+1)\Delta t} - i\Delta t$ ,  $w_i = \frac{\lambda^i}{\sum_{k=0}^{59} \lambda^k}$ ,  $0 \leq \lambda < 1$ . Also reported are returns on a strategy that equally combines the strategies available within a given month, *Comb*. Panel A reports the results of predictive regressions on excess returns. Panel B reports the CAPM-adjusted results. Both *DOX* and *b* are standardized to have a standard deviation of one. The sample period is from 1992:08 to 2018:07. All *t*-statistics are based on the heteroskedasticity-consistent standard errors of White (1980).

| Anomaly                |      | Long leg |                     |          | Short leg           |         |                     | Long-Short |                     |         |                     |          |                     |
|------------------------|------|----------|---------------------|----------|---------------------|---------|---------------------|------------|---------------------|---------|---------------------|----------|---------------------|
|                        |      | $\beta$  | <i>t</i> -Statistic | $\gamma$ | <i>t</i> -Statistic | $\beta$ | <i>t</i> -Statistic | $\gamma$   | <i>t</i> -Statistic | $\beta$ | <i>t</i> -Statistic | $\gamma$ | <i>t</i> -Statistic |
| Panel A: Excess return |      |          |                     |          |                     |         |                     |            |                     |         |                     |          |                     |
|                        | BM   | 0.16     | (0.37)              | 0.17     | (0.43)              | -1.13   | (-2.98)             | -0.77      | (-2.62)             | 1.29    | (3.64)              | 0.94     | (2.98)              |
|                        | AM   | -0.13    | (-0.31)             | -0.11    | (-0.29)             | -1.19   | (-2.94)             | -0.78      | (-2.56)             | 1.06    | (2.95)              | 0.66     | (2.14)              |
|                        | REV  | -0.30    | (-0.61)             | -0.27    | (-0.63)             | -1.40   | (-2.88)             | -0.92      | (-2.66)             | 1.10    | (2.95)              | 0.65     | (1.98)              |
|                        | EP   | -0.03    | (-0.08)             | -0.08    | (-0.26)             | -1.13   | (-2.41)             | -0.66      | (-1.97)             | 1.09    | (3.12)              | 0.58     | (2.25)              |
|                        | EFP  | -0.34    | (-0.93)             | -0.33    | (-1.10)             | -1.08   | (-2.10)             | -0.65      | (-1.74)             | 0.74    | (1.88)              | 0.32     | (1.17)              |
|                        | CP   | -0.04    | (-0.09)             | -0.05    | (-0.13)             | -1.16   | (-2.10)             | -0.89      | (-2.05)             | 1.12    | (2.63)              | 0.84     | (2.82)              |
|                        | DP   | -0.02    | (-0.06)             | -0.11    | (-0.42)             | -1.10   | (-2.52)             | -0.68      | (-1.99)             | 1.08    | (2.52)              | 0.57     | (1.59)              |
|                        | OP   | -0.13    | (-0.42)             | -0.17    | (-0.58)             | -1.05   | (-2.01)             | -0.80      | (-1.94)             | 0.92    | (2.33)              | 0.63     | (2.19)              |
|                        | NOP  | -0.07    | (-0.21)             | -0.06    | (-0.21)             | -0.61   | (-1.26)             | -0.34      | (-0.88)             | 0.54    | (1.55)              | 0.28     | (0.99)              |
|                        | SG   | -0.58    | (-1.51)             | -0.29    | (-0.89)             | -1.29   | (-2.56)             | -0.80      | (-2.12)             | 0.71    | (2.17)              | 0.51     | (1.73)              |
|                        | LTG  | -0.03    | (-0.10)             | -0.05    | (-0.14)             | -1.57   | (-2.51)             | -0.91      | (-2.13)             | 1.54    | (2.71)              | 0.86     | (1.91)              |
|                        | DUR  | -0.15    | (-0.35)             | 0.03     | (0.10)              | -1.18   | (-2.48)             | -0.77      | (-2.03)             | 1.03    | (3.31)              | 0.80     | (2.91)              |
|                        | Comb | -0.14    | (-0.42)             | -0.11    | (-0.38)             | -1.16   | (-2.51)             | -0.75      | (-2.19)             | 1.02    | (3.70)              | 0.64     | (3.21)              |
| Panel B: CAPM adjusted |      |          |                     |          |                     |         |                     |            |                     |         |                     |          |                     |
|                        | BM   | 1.03     | (3.85)              | 0.68     | (2.73)              | -0.39   | (-2.87)             | -0.34      | (-2.43)             | 1.43    | (4.01)              | 1.02     | (3.26)              |
|                        | AM   | 0.74     | (2.58)              | 0.40     | (1.79)              | -0.42   | (-2.84)             | -0.32      | (-2.11)             | 1.16    | (3.11)              | 0.72     | (2.36)              |
|                        | REV  | 0.73     | (2.41)              | 0.33     | (1.18)              | -0.52   | (-2.43)             | -0.41      | (-2.07)             | 1.25    | (3.20)              | 0.74     | (2.27)              |
|                        | EP   | 0.69     | (3.05)              | 0.35     | (2.22)              | -0.23   | (-1.19)             | -0.14      | (-0.82)             | 0.93    | (2.80)              | 0.48     | (1.86)              |
|                        | EFP  | 0.35     | (1.72)              | 0.07     | (0.43)              | -0.10   | (-0.49)             | -0.08      | (-0.56)             | 0.45    | (1.33)              | 0.15     | (0.60)              |
|                        | CP   | 0.73     | (2.67)              | 0.41     | (1.96)              | -0.09   | (-0.36)             | -0.26      | (-1.23)             | 0.82    | (2.11)              | 0.67     | (2.29)              |
|                        | DP   | 0.36     | (1.47)              | 0.11     | (0.50)              | -0.27   | (-1.41)             | -0.19      | (-1.16)             | 0.62    | (1.80)              | 0.30     | (0.92)              |
|                        | OP   | 0.49     | (2.57)              | 0.20     | (1.22)              | -0.08   | (-0.26)             | -0.23      | (-1.03)             | 0.57    | (1.62)              | 0.42     | (1.60)              |
|                        | NOP  | 0.55     | (2.72)              | 0.30     | (1.82)              | 0.35    | (1.62)              | 0.22       | (1.27)              | 0.20    | (0.67)              | 0.07     | (0.28)              |
|                        | SG   | 0.23     | (1.25)              | 0.18     | (1.26)              | -0.36   | (-1.75)             | -0.26      | (-1.26)             | 0.60    | (1.93)              | 0.44     | (1.51)              |
|                        | LTG  | 0.42     | (1.80)              | 0.22     | (0.82)              | -0.49   | (-1.74)             | -0.27      | (-1.19)             | 0.91    | (2.16)              | 0.49     | (1.18)              |
|                        | DUR  | 0.69     | (3.04)              | 0.53     | (3.11)              | -0.25   | (-1.35)             | -0.22      | (-1.20)             | 0.93    | (3.09)              | 0.75     | (2.72)              |
|                        | Comb | 0.58     | (3.87)              | 0.31     | (2.76)              | -0.24   | (-1.63)             | -0.21      | (-1.65)             | 0.82    | (3.54)              | 0.52     | (2.72)              |

**Table IA2. Controlling for prospect theory effect**

The table reports estimates of  $b$  in the regression  $R_t^* = a + bDOX_{t-1} + \epsilon_t$ , where  $R_t^*$  is the excess return (in percentages) on the portfolio that controls for the prospect theory value ( $TK$ ). The value  $TK$  is constructed following the approach of Barberis, Mukherjee, and Wang (2016). We use a dependent sort to construct the anomaly portfolios. We first sort stocks into terciles of the firm-level  $TK$  value. Within each  $TK$  tercile, we further sort firms into deciles of firm characteristics and form long-short portfolios. We finally create long-short anomaly portfolios as the average return on the three individual portfolios. Also reported are returns on a strategy that equally combines the strategies available within a given month, *Comb*. Panel B reports the CAPM-adjusted results.  $DOX$  is standardized to have a standard deviation of one. The sample period is from 1992:08 to 2018:07. All  $t$ -statistics are based on the heteroskedasticity-consistent standard errors of White (1980).

| Panel A: Excess return |          |                |           |                |            |                |
|------------------------|----------|----------------|-----------|----------------|------------|----------------|
| Anomaly                | Long leg |                | Short leg |                | Long-Short |                |
|                        | $b$      | $t$ -Statistic | $b$       | $t$ -Statistic | $b$        | $t$ -Statistic |
| BM                     | 0.17     | (0.54)         | -0.36     | (-1.15)        | 0.54       | (2.10)         |
| AM                     | 0.10     | (0.31)         | -0.42     | (-1.30)        | 0.52       | (1.89)         |
| REV                    | 0.25     | (0.55)         | -0.66     | (-1.44)        | 0.92       | (2.53)         |
| EP                     | -0.05    | (-0.15)        | -0.35     | (-1.10)        | 0.30       | (1.22)         |
| EFP                    | 0.08     | (0.27)         | -0.40     | (-1.09)        | 0.48       | (1.82)         |
| CP                     | -0.00    | (-0.00)        | -0.36     | (-0.92)        | 0.36       | (1.21)         |
| DP                     | 0.07     | (0.30)         | -0.03     | (-0.11)        | 0.10       | (0.38)         |
| OP                     | -0.06    | (-0.22)        | -0.32     | (-0.88)        | 0.25       | (0.97)         |
| NOP                    | -0.06    | (-0.22)        | -0.23     | (-0.68)        | 0.18       | (0.79)         |
| SG                     | -0.22    | (-0.74)        | -0.43     | (-1.16)        | 0.21       | (0.98)         |
| LTG                    | -0.06    | (-0.25)        | -0.75     | (-1.78)        | 0.69       | (2.03)         |
| DUR                    | -0.09    | (-0.27)        | -0.39     | (-1.14)        | 0.30       | (1.36)         |
| COMB                   | 0.01     | (0.05)         | -0.39     | (-1.16)        | 0.40       | (2.29)         |

  

| Panel B: CAPM adjusted |          |                |           |                |            |                |
|------------------------|----------|----------------|-----------|----------------|------------|----------------|
| Anomaly                | Long leg |                | Short leg |                | Long-Short |                |
|                        | $b$      | $t$ -Statistic | $b$       | $t$ -Statistic | $b$        | $t$ -Statistic |
| BM                     | 0.66     | (3.32)         | 0.14      | (0.95)         | 0.52       | (2.10)         |
| AM                     | 0.60     | (2.78)         | 0.09      | (0.62)         | 0.51       | (1.86)         |
| REV                    | 0.95     | (2.75)         | -0.00     | (-0.01)        | 0.96       | (2.54)         |
| EP                     | 0.43     | (2.20)         | 0.18      | (1.23)         | 0.25       | (1.03)         |
| EFP                    | 0.56     | (2.75)         | 0.19      | (1.21)         | 0.36       | (1.47)         |
| CP                     | 0.48     | (2.19)         | 0.25      | (1.33)         | 0.23       | (0.80)         |
| DP                     | 0.38     | (2.07)         | 0.46      | (2.21)         | -0.08      | (-0.31)        |
| OP                     | 0.37     | (2.20)         | 0.23      | (1.04)         | 0.13       | (0.51)         |
| NOP                    | 0.36     | (2.21)         | 0.32      | (1.93)         | 0.04       | (0.19)         |
| SG                     | 0.30     | (1.95)         | 0.14      | (0.83)         | 0.15       | (0.73)         |
| LTG                    | 0.27     | (1.58)         | -0.10     | (-0.57)        | 0.38       | (1.41)         |
| DUR                    | 0.41     | (2.14)         | 0.17      | (1.23)         | 0.24       | (1.10)         |
| COMB                   | 0.48     | (3.37)         | 0.17      | (1.35)         | 0.31       | (1.93)         |

**Table IA3. Long-horizon predictive regressions**

The table reports long-horizon overlapping predictive regression results. We regress future (1-month, 3-month, 12-month, 3-year, and 5-year) anomalies' long-short returns (in percentages) onto corresponding past DOX. Also reported are returns on a strategy that equally combines the strategies available within a given month, *Comb*. Panel A reports the results of overreaction- and underreaction-related anomalies based on the three-month moving average DOX series. Panels B, C, and D are robustness tests. Panel B uses the raw series of DOX, and panel C lags the smoothed DOX series for one more month. Panel D uses Hodrick (1992) overlapping-adjusted  $t$ -statistics. The sample period is from 1992:08 to 2018:07 for panel A, panel B, and panel D. The sample period is from 1992:09 to 2018:08 for panel C. The Newey-West (1987)  $t$ -statistics given in parentheses control for heteroskedasticity and autocorrelation.

Panel A: 3-month moving average DOX

| Anomaly | 1-month |                | 3-month |                | 12-month |                | 3-year |                | 5-year |                |
|---------|---------|----------------|---------|----------------|----------|----------------|--------|----------------|--------|----------------|
|         | $b$     | $t$ -Statistic | $b$     | $t$ -Statistic | $b$      | $t$ -Statistic | $b$    | $t$ -Statistic | $b$    | $t$ -Statistic |
| BM      | 0.64    | (2.04)         | 1.89    | (2.06)         | 5.90     | (2.70)         | 11.96  | (2.68)         | 13.18  | (1.79)         |
| AM      | 0.61    | (1.79)         | 1.72    | (1.82)         | 4.74     | (2.12)         | 9.90   | (3.50)         | 13.75  | (3.45)         |
| REV     | 0.66    | (2.16)         | 1.95    | (2.30)         | 6.45     | (2.80)         | 6.34   | (1.35)         | -7.19  | (-0.90)        |
| EP      | 0.70    | (2.85)         | 1.99    | (3.02)         | 6.02     | (3.37)         | 10.48  | (3.46)         | 8.23   | (1.72)         |
| EFF     | 0.52    | (1.76)         | 1.39    | (1.74)         | 5.64     | (2.20)         | 1.49   | (0.22)         | -20.14 | (-1.88)        |
| CP      | 0.54    | (1.59)         | 1.48    | (1.63)         | 3.81     | (1.99)         | 6.20   | (2.41)         | 12.12  | (3.57)         |
| DP      | 0.69    | (2.33)         | 2.10    | (2.63)         | 7.07     | (3.77)         | 17.14  | (5.27)         | 19.15  | (4.25)         |
| OP      | 0.49    | (1.44)         | 1.62    | (1.62)         | 6.64     | (2.14)         | -0.99  | (-0.26)        | -19.06 | (-3.12)        |
| NOP     | 0.35    | (1.34)         | 1.16    | (1.59)         | 4.06     | (1.73)         | -2.37  | (-0.78)        | -18.64 | (-4.74)        |
| SG      | 0.37    | (1.62)         | 1.12    | (1.89)         | 2.85     | (2.08)         | 6.27   | (3.13)         | 7.18   | (3.25)         |
| LTG     | 0.95    | (2.59)         | 2.83    | (2.95)         | 9.48     | (4.04)         | 14.02  | (4.37)         | 12.99  | (3.97)         |
| DUR     | 0.48    | (1.87)         | 1.44    | (1.99)         | 4.43     | (2.56)         | 10.71  | (3.44)         | 18.06  | (3.98)         |
| Comb    | 0.58    | (2.63)         | 1.73    | (2.88)         | 5.71     | (3.67)         | 8.54   | (3.41)         | 5.67   | (1.38)         |
|         |         |                |         |                |          |                |        |                |        |                |
| Anomaly | 1-month |                | 3-month |                | 12-month |                | 3-year |                | 5-year |                |
|         | $b$     | $t$ -Statistic | $b$     | $t$ -Statistic | $b$      | $t$ -Statistic | $b$    | $t$ -Statistic | $b$    | $t$ -Statistic |
| SUE1    | -0.02   | (-0.14)        | -0.19   | (-0.47)        | -1.17    | (-1.11)        | -7.66  | (-3.20)        | -14.82 | (-5.27)        |
| SUE6    | -0.05   | (-0.36)        | -0.25   | (-0.78)        | -0.95    | (-1.28)        | -6.19  | (-4.71)        | -12.07 | (-8.34)        |
| ABR1    | -0.18   | (-0.94)        | -0.80   | (-1.51)        | -4.33    | (-3.20)        | -13.99 | (-7.21)        | -17.90 | (-6.13)        |
| ABR6    | -0.19   | (-1.36)        | -0.78   | (-2.08)        | -3.79    | (-3.74)        | -9.34  | (-3.72)        | -11.36 | (-3.17)        |
| RE1     | -0.29   | (-0.91)        | -0.92   | (-1.09)        | -4.01    | (-2.00)        | -10.16 | (-3.66)        | -7.67  | (-2.00)        |
| RE6     | 0.08    | (0.34)         | 0.23    | (0.36)         | 0.47     | (0.29)         | -0.76  | (-0.30)        | 0.72   | (0.28)         |
| R6_1    | -0.52   | (-1.22)        | -1.95   | (-1.95)        | -9.38    | (-3.59)        | -37.70 | (-6.93)        | -64.32 | (-6.91)        |
| R6_6    | -0.28   | (-0.78)        | -1.06   | (-1.06)        | -5.10    | (-1.87)        | -29.58 | (-5.50)        | -64.79 | (-6.69)        |
| R11     | -0.42   | (-0.90)        | -1.44   | (-1.19)        | -6.84    | (-2.24)        | -33.81 | (-6.56)        | -71.32 | (-8.78)        |
| IM      | 0.01    | (0.02)         | -0.38   | (-0.43)        | -4.08    | (-1.95)        | -12.25 | (-2.29)        | -17.81 | (-3.02)        |
| Comb    | -0.19   | (-0.85)        | -0.75   | (-1.32)        | -3.86    | (-2.76)        | -15.93 | (-6.05)        | -28.02 | (-7.67)        |

Table IA3 (cont.). Long-horizon predictive regressions

Panel B: raw DOX

| Anomaly       | 1-month  |                    | 3-month          |                    | 12-month          |                    | 3-year           |                    | 5-year           |                    |                   |
|---------------|----------|--------------------|------------------|--------------------|-------------------|--------------------|------------------|--------------------|------------------|--------------------|-------------------|
|               | <i>b</i> | <i>t-Statistic</i> | <i>b</i>         | <i>t-Statistic</i> | <i>b</i>          | <i>t-Statistic</i> | <i>b</i>         | <i>t-Statistic</i> | <i>b</i>         | <i>t-Statistic</i> |                   |
| Overreaction  | BM       | 0.56<br>(1.79)     | 1.89<br>(2.11)   | 6.15<br>(2.80)     | 12.56<br>(2.85)   | 13.95<br>(1.87)    | 0.56<br>(1.79)   | 1.89<br>(2.11)     | 6.15<br>(2.80)   | 12.56<br>(2.85)    | 13.95<br>(1.87)   |
|               | AM       | 0.56<br>(1.62)     | 1.82<br>(1.91)   | 4.97<br>(2.25)     | 10.20<br>(3.69)   | 13.85<br>(3.37)    | 0.56<br>(1.62)   | 1.82<br>(1.91)     | 4.97<br>(2.25)   | 10.20<br>(3.69)    | 13.85<br>(3.37)   |
|               | REV      | 0.57<br>(1.90)     | 1.92<br>(2.30)   | 6.80<br>(2.92)     | 7.73<br>(1.65)    | -5.87<br>(-0.76)   | 0.57<br>(1.90)   | 1.92<br>(2.30)     | 6.80<br>(2.92)   | 7.73<br>(1.65)     | -5.87<br>(-0.76)  |
|               | EP       | 0.67<br>(2.61)     | 2.06<br>(3.08)   | 6.21<br>(3.52)     | 11.10<br>(3.73)   | 8.55<br>(1.73)     | 0.67<br>(2.61)   | 2.06<br>(3.08)     | 6.21<br>(3.52)   | 11.10<br>(3.73)    | 8.55<br>(1.73)    |
|               | EFP      | 0.60<br>(1.86)     | 1.61<br>(1.86)   | 5.86<br>(2.17)     | 3.38<br>(0.49)    | -18.33<br>(-1.61)  | 0.60<br>(1.86)   | 1.61<br>(1.86)     | 5.86<br>(2.17)   | 3.38<br>(0.49)     | -18.33<br>(-1.61) |
|               | CP       | 0.56<br>(1.57)     | 1.72<br>(1.81)   | 4.13<br>(2.18)     | 6.48<br>(2.57)    | 12.23<br>(3.49)    | 0.56<br>(1.57)   | 1.72<br>(1.81)     | 4.13<br>(2.18)   | 6.48<br>(2.57)     | 12.23<br>(3.49)   |
|               | DP       | 0.71<br>(2.34)     | 2.08<br>(2.57)   | 7.15<br>(3.61)     | 17.26<br>(5.24)   | 19.80<br>(4.46)    | 0.71<br>(2.34)   | 2.08<br>(2.57)     | 7.15<br>(3.61)   | 17.26<br>(5.24)    | 19.80<br>(4.46)   |
|               | OP       | 0.48<br>(1.44)     | 1.52<br>(1.56)   | 6.62<br>(2.18)     | 0.13<br>(0.03)    | -18.21<br>(-2.99)  | 0.48<br>(1.44)   | 1.52<br>(1.56)     | 6.62<br>(2.18)   | 0.13<br>(0.03)     | -18.21<br>(-2.99) |
|               | NOP      | 0.35<br>(1.26)     | 1.16<br>(1.56)   | 4.16<br>(1.80)     | -1.24<br>(-0.40)  | -17.89<br>(-4.59)  | 0.35<br>(1.26)   | 1.16<br>(1.56)     | 4.16<br>(1.80)   | -1.24<br>(-0.40)   | -17.89<br>(-4.59) |
|               | SG       | 0.33<br>(1.42)     | 1.07<br>(1.78)   | 2.96<br>(2.11)     | 6.73<br>(3.38)    | 7.31<br>(3.32)     | 0.33<br>(1.42)   | 1.07<br>(1.78)     | 2.96<br>(2.11)   | 6.73<br>(3.38)     | 7.31<br>(3.32)    |
|               | LTG      | 0.90<br>(2.38)     | 2.79<br>(2.89)   | 9.65<br>(4.00)     | 14.58<br>(4.50)   | 13.50<br>(4.02)    | 0.90<br>(2.38)   | 2.79<br>(2.89)     | 9.65<br>(4.00)   | 14.58<br>(4.50)    | 13.50<br>(4.02)   |
|               | DUR      | 0.42<br>(1.63)     | 1.49<br>(2.10)   | 4.57<br>(2.70)     | 10.82<br>(3.52)   | 18.17<br>(3.89)    | 0.42<br>(1.63)   | 1.49<br>(2.10)     | 4.57<br>(2.70)   | 10.82<br>(3.52)    | 18.17<br>(3.89)   |
|               | Comb     | 0.56<br>(2.40)     | 1.76<br>(2.83)   | 5.89<br>(3.72)     | 9.22<br>(3.62)    | 6.28<br>(1.50)     | 0.56<br>(2.40)   | 1.76<br>(2.83)     | 5.89<br>(3.72)   | 9.22<br>(3.62)     | 6.28<br>(1.50)    |
| Underreaction | SUE1     | 0.07<br>(0.44)     | -0.10<br>(-0.25) | -1.00<br>(-0.98)   | -7.25<br>(-3.06)  | -14.95<br>(-5.31)  | 0.07<br>(0.44)   | -0.10<br>(-0.25)   | -1.00<br>(-0.98) | -7.25<br>(-3.06)   | -14.95<br>(-5.31) |
|               | SUE6     | 0.01<br>(0.11)     | -0.16<br>(-0.48) | -0.91<br>(-1.24)   | -5.80<br>(-4.27)  | -12.20<br>(-8.44)  | 0.01<br>(0.11)   | -0.16<br>(-0.48)   | -0.91<br>(-1.24) | -5.80<br>(-4.27)   | -12.20<br>(-8.44) |
|               | ABR1     | -0.10<br>(-0.54)   | -0.58<br>(-1.13) | -4.06<br>(-3.01)   | -13.51<br>(-6.91) | -17.91<br>(-6.07)  | -0.10<br>(-0.54) | -0.58<br>(-1.13)   | -4.06<br>(-3.01) | -13.51<br>(-6.91)  | -17.91<br>(-6.07) |
|               | ABR6     | -0.13<br>(-0.93)   | -0.61<br>(-1.68) | -3.60<br>(-3.67)   | -9.18<br>(-3.89)  | -10.94<br>(-3.00)  | -0.13<br>(-0.93) | -0.61<br>(-1.68)   | -3.60<br>(-3.67) | -9.18<br>(-3.89)   | -10.94<br>(-3.00) |
|               | RE1      | -0.17<br>(-0.51)   | -0.93<br>(-1.07) | -4.01<br>(-1.98)   | -10.09<br>(-3.55) | -8.68<br>(-2.28)   | -0.17<br>(-0.51) | -0.93<br>(-1.07)   | -4.01<br>(-1.98) | -10.09<br>(-3.55)  | -8.68<br>(-2.28)  |
|               | RE6      | 0.19<br>(0.76)     | 0.22<br>(0.34)   | 0.52<br>(0.32)     | -0.45<br>(-0.17)  | -0.14<br>(-0.05)   | 0.19<br>(0.76)   | 0.22<br>(0.34)     | 0.52<br>(0.32)   | -0.45<br>(-0.17)   | -0.14<br>(-0.05)  |
|               | R6.1     | -0.35<br>(-0.76)   | -1.75<br>(-1.68) | -9.15<br>(-3.56)   | -36.38<br>(-6.70) | -63.99<br>(-6.80)  | -0.35<br>(-0.76) | -1.75<br>(-1.68)   | -9.15<br>(-3.56) | -36.38<br>(-6.70)  | -63.99<br>(-6.80) |
|               | R6.6     | -0.13<br>(-0.36)   | -0.93<br>(-0.95) | -4.81<br>(-1.80)   | -28.09<br>(-5.23) | -64.02<br>(-6.64)  | -0.13<br>(-0.36) | -0.93<br>(-0.95)   | -4.81<br>(-1.80) | -28.09<br>(-5.23)  | -64.02<br>(-6.64) |
|               | R11      | -0.24<br>(-0.50)   | -1.39<br>(-1.13) | -6.62<br>(-2.19)   | -32.19<br>(-6.09) | -70.95<br>(-8.77)  | -0.24<br>(-0.50) | -1.39<br>(-1.13)   | -6.62<br>(-2.19) | -32.19<br>(-6.09)  | -70.95<br>(-8.77) |
|               | IM       | 0.16<br>(0.46)     | -0.15<br>(-0.17) | -3.93<br>(-1.93)   | -11.71<br>(-2.26) | -17.20<br>(-2.92)  | 0.16<br>(0.46)   | -0.15<br>(-0.17)   | -3.93<br>(-1.93) | -11.71<br>(-2.26)  | -17.20<br>(-2.92) |
|               | Comb     | -0.07<br>(-0.31)   | -0.63<br>(-1.11) | -3.69<br>(-2.66)   | -15.22<br>(-5.74) | -27.96<br>(-7.53)  | -0.07<br>(-0.31) | -0.63<br>(-1.11)   | -3.69<br>(-2.66) | -15.22<br>(-5.74)  | -27.96<br>(-7.53) |

**Table IA3 (cont.). Long-horizon predictive regressions**

Panel C: 3-month moving average DOX, lagged one more month

| Anomaly       | 1-month  |                    | 3-month  |                    | 12-month |                    | 3-year   |                    | 5-year   |                    |         |
|---------------|----------|--------------------|----------|--------------------|----------|--------------------|----------|--------------------|----------|--------------------|---------|
|               | <i>b</i> | <i>t-Statistic</i> |         |
| Overreaction  | BM       | 0.63               | (1.96)   | 1.72               | (1.85)   | 5.69               | (2.72)   | 11.23              | (2.54)   | 12.42              | (1.68)  |
|               | AM       | 0.56               | (1.67)   | 1.45               | (1.57)   | 4.59               | (2.09)   | 9.50               | (3.37)   | 13.68              | (3.51)  |
|               | REV      | 0.67               | (2.15)   | 1.80               | (2.14)   | 6.06               | (2.73)   | 4.80               | (1.03)   | -8.69              | (-1.05) |
|               | EP       | 0.67               | (2.82)   | 1.85               | (2.88)   | 5.75               | (3.24)   | 9.63               | (3.17)   | 8.07               | (1.72)  |
|               | EFP      | 0.44               | (1.59)   | 1.22               | (1.68)   | 5.32               | (2.20)   | -0.40              | (-0.06)  | -21.17             | (-2.07) |
|               | CP       | 0.48               | (1.46)   | 1.25               | (1.45)   | 3.43               | (1.77)   | 5.75               | (2.21)   | 12.12              | (3.60)  |
|               | DP       | 0.70               | (2.36)   | 2.05               | (2.61)   | 6.89               | (3.87)   | 16.52              | (5.07)   | 18.23              | (3.93)  |
|               | OP       | 0.52               | (1.51)   | 1.63               | (1.64)   | 6.43               | (2.06)   | -2.25              | (-0.60)  | -19.80             | (-3.21) |
|               | NOP      | 0.37               | (1.46)   | 1.17               | (1.66)   | 3.86               | (1.62)   | -3.55              | (-1.19)  | -19.33             | (-4.78) |
|               | SG       | 0.39               | (1.73)   | 1.08               | (1.85)   | 2.79               | (2.08)   | 5.71               | (2.86)   | 7.12               | (3.21)  |
|               | LTG      | 0.97               | (2.65)   | 2.75               | (2.88)   | 9.16               | (3.99)   | 12.98              | (4.07)   | 12.44              | (3.80)  |
|               | DUR      | 0.47               | (1.77)   | 1.35               | (1.86)   | 4.29               | (2.49)   | 10.49              | (3.39)   | 18.15              | (4.09)  |
|               | Comb     | 0.57               | (2.67)   | 1.61               | (2.83)   | 5.46               | (3.62)   | 7.64               | (3.11)   | 5.10               | (1.24)  |
| Underreaction | SUE1     | -0.07              | (-0.46)  | -0.16              | (-0.38)  | -1.31              | (-1.19)  | -7.98              | (-3.32)  | -14.70             | (-5.20) |
|               | SUE6     | -0.09              | (-0.73)  | -0.25              | (-0.78)  | -0.99              | (-1.31)  | -6.44              | (-5.02)  | -11.88             | (-8.11) |
|               | ABR1     | -0.27              | (-1.36)  | -0.97              | (-1.83)  | -4.49              | (-3.34)  | -14.12             | (-7.27)  | -17.72             | (-6.06) |
|               | ABR6     | -0.25              | (-1.80)  | -0.92              | (-2.36)  | -3.89              | (-3.81)  | -9.30              | (-3.59)  | -11.82             | (-3.37) |
|               | RE1      | -0.34              | (-1.12)  | -0.82              | (-1.00)  | -3.92              | (-1.98)  | -10.03             | (-3.75)  | -6.55              | (-1.67) |
|               | RE6      | 0.05               | (0.21)   | 0.30               | (0.47)   | 0.46               | (0.29)   | -0.98              | (-0.40)  | 1.74               | (0.68)  |
|               | R6.1     | -0.64              | (-1.62)  | -2.04              | (-2.09)  | -9.50              | (-3.65)  | -38.35             | (-7.08)  | -64.49             | (-7.01) |
|               | R6.6     | -0.38              | (-1.05)  | -1.08              | (-1.09)  | -5.22              | (-1.90)  | -30.38             | (-5.64)  | -65.45             | (-6.74) |
|               | R11      | -0.48              | (-1.07)  | -1.38              | (-1.16)  | -6.74              | (-2.23)  | -34.60             | (-6.83)  | -71.19             | (-8.73) |
|               | IM       | -0.12              | (-0.33)  | -0.61              | (-0.67)  | -4.00              | (-1.90)  | -12.42             | (-2.27)  | -18.42             | (-3.13) |
|               | Comb     | -0.26              | (-1.21)  | -0.79              | (-1.40)  | -3.91              | (-2.81)  | -16.28             | (-6.21)  | -27.99             | (-7.80) |

**Table IA3 (cont.). Long-horizon predictive regressions**

Panel D: 3-month moving average DOX, Hodrick (1992) *t*-statistics

| Anomaly      | 1-month       |                    | 3-month  |                    | 12-month |                    | 3-year   |                    | 5-year   |                    |         |
|--------------|---------------|--------------------|----------|--------------------|----------|--------------------|----------|--------------------|----------|--------------------|---------|
|              | <i>b</i>      | <i>t-Statistic</i> | <i>b</i> | <i>t-Statistic</i> | <i>b</i> | <i>t-Statistic</i> | <i>b</i> | <i>t-Statistic</i> | <i>b</i> | <i>t-Statistic</i> |         |
| Overreaction | BM            | 0.64               | (2.04)   | 1.89               | (2.30)   | 5.90               | (1.99)   | 11.96              | (1.63)   | 13.18              | (1.38)  |
|              | AM            | 0.61               | (1.79)   | 1.72               | (2.07)   | 4.74               | (1.55)   | 9.90               | (1.25)   | 13.75              | (1.25)  |
|              | REV           | 0.66               | (2.16)   | 1.95               | (2.34)   | 6.45               | (2.16)   | 6.34               | (0.73)   | -7.19              | (-0.56) |
|              | EP            | 0.70               | (2.85)   | 1.99               | (2.68)   | 6.02               | (2.32)   | 10.48              | (1.41)   | 8.23               | (0.72)  |
|              | EFP           | 0.52               | (1.76)   | 1.39               | (1.70)   | 5.64               | (2.00)   | 1.49               | (0.21)   | -20.14             | (-1.73) |
|              | CP            | 0.54               | (1.59)   | 1.48               | (1.64)   | 3.81               | (1.20)   | 6.20               | (0.74)   | 12.12              | (0.87)  |
|              | DP            | 0.69               | (2.33)   | 2.10               | (2.41)   | 7.07               | (2.24)   | 17.14              | (1.89)   | 19.15              | (1.26)  |
|              | OP            | 0.49               | (1.44)   | 1.62               | (1.83)   | 6.64               | (1.98)   | -0.99              | (-0.11)  | -19.06             | (-1.38) |
|              | NOP           | 0.35               | (1.34)   | 1.16               | (1.58)   | 4.06               | (1.57)   | -2.37              | (-0.33)  | -18.64             | (-1.61) |
|              | SG            | 0.37               | (1.62)   | 1.12               | (1.56)   | 2.85               | (1.07)   | 6.27               | (0.85)   | 7.18               | (0.67)  |
|              | LTG           | 0.95               | (2.59)   | 2.83               | (2.41)   | 9.48               | (2.42)   | 14.02              | (1.36)   | 12.99              | (0.72)  |
|              | DUR           | 0.48               | (1.87)   | 1.44               | (2.00)   | 4.43               | (1.66)   | 10.71              | (1.64)   | 18.06              | (1.87)  |
|              | Comb          | 0.58               | (2.63)   | 1.73               | (2.98)   | 5.71               | (2.99)   | 8.54               | (1.69)   | 5.67               | (0.66)  |
|              | Underreaction | SUE1               | -0.02    | (-0.14)            | -0.19    | (-0.33)            | -1.17    | (-0.53)            | -7.66    | (-1.37)            | -14.82  |
| SUE6         |               | -0.05              | (-0.36)  | -0.25              | (-0.50)  | -0.95              | (-0.49)  | -6.19              | (-1.39)  | -12.07             | (-1.81) |
| ABR1         |               | -0.18              | (-0.94)  | -0.80              | (-1.31)  | -4.33              | (-1.90)  | -13.99             | (-2.35)  | -17.90             | (-1.95) |
| ABR6         |               | -0.19              | (-1.36)  | -0.78              | (-1.77)  | -3.79              | (-2.33)  | -9.34              | (-2.18)  | -11.36             | (-1.80) |
| RE1          |               | -0.29              | (-0.91)  | -0.92              | (-0.87)  | -4.01              | (-1.09)  | -10.16             | (-1.15)  | -7.67              | (-0.57) |
| RE6          |               | 0.08               | (0.34)   | 0.23               | (0.28)   | 0.47               | (0.16)   | -0.76              | (-0.10)  | 0.72               | (0.07)  |
| R6.1         |               | -0.52              | (-1.22)  | -1.95              | (-1.46)  | -9.38              | (-1.93)  | -37.70             | (-2.82)  | -64.32             | (-3.36) |
| R6.6         |               | -0.28              | (-0.78)  | -1.06              | (-1.02)  | -5.10              | (-1.35)  | -29.58             | (-2.89)  | -64.79             | (-4.33) |
| R11          |               | -0.42              | (-0.90)  | -1.44              | (-1.04)  | -6.84              | (-1.35)  | -33.81             | (-2.52)  | -71.32             | (-3.74) |
| IM           |               | 0.01               | (0.02)   | -0.38              | (-0.31)  | -4.08              | (-0.92)  | -12.25             | (-1.10)  | -17.81             | (-1.07) |
| Comb         |               | -0.19              | (-0.85)  | -0.75              | (-1.02)  | -3.86              | (-1.44)  | -15.93             | (-2.36)  | -28.02             | (-2.94) |

**Table IA4. Longer DOX and anomalies**

The table reports estimates of  $b$  in the regression  $R_t = a + bDOX_{t-1} + \epsilon_t$ , where  $R_t$  is the excess return (in percentages) in month  $t$  on the long leg, the short leg, or the difference. Also reported are returns on a strategy that equally combines the strategies available within a given month, *Comb*. Panel B reports CAPM-adjusted results. DOX is standardized to have a standard deviation of one. This DOX uses the DOX extracted from the Investor Intelligence Survey during the period 1969:06–1992:06. The subsequent DOX series are estimated based on the principal component time series of two surveys as before. The sample period is from 1974:08 to 2018:07. All  $t$ -statistics are based on the heteroskedasticity-consistent standard errors of White (1980).

| Panel A: Excess return |          |                |           |                |            |                |
|------------------------|----------|----------------|-----------|----------------|------------|----------------|
| Anomaly                | Long leg |                | Short leg |                | Long-Short |                |
|                        | $b$      | $t$ -Statistic | $b$       | $t$ -Statistic | $b$        | $t$ -Statistic |
| BM                     | 0.04     | (0.17)         | -0.45     | (-1.87)        | 0.49       | (2.45)         |
| AM                     | 0.03     | (0.11)         | -0.46     | (-1.91)        | 0.49       | (2.46)         |
| REV                    | 0.08     | (0.30)         | -0.55     | (-1.95)        | 0.64       | (3.13)         |
| EP                     | -0.09    | (-0.41)        | -0.38     | (-1.37)        | 0.29       | (1.42)         |
| EFP                    | -0.06    | (-0.30)        | -0.46     | (-1.63)        | 0.40       | (2.02)         |
| CP                     | -0.05    | (-0.22)        | -0.26     | (-0.82)        | 0.21       | (0.90)         |
| DP                     | 0.10     | (0.63)         | -0.41     | (-1.54)        | 0.50       | (2.13)         |
| OP                     | 0.04     | (0.20)         | -0.37     | (-1.21)        | 0.41       | (1.80)         |
| NOP                    | 0.01     | (0.06)         | -0.21     | (-0.81)        | 0.22       | (1.28)         |
| SG                     | -0.21    | (-0.91)        | -0.56     | (-1.95)        | 0.35       | (1.93)         |
| LTG                    | -0.02    | (-0.08)        | -0.64     | (-1.68)        | 0.63       | (1.85)         |
| DUR                    | -0.17    | (-0.72)        | -0.39     | (-1.39)        | 0.22       | (1.19)         |
| Comb                   | -0.03    | (-0.15)        | -0.42     | (-1.57)        | 0.39       | (2.54)         |

  

| Panel B: CAPM adjusted |          |                |           |                |            |                |
|------------------------|----------|----------------|-----------|----------------|------------|----------------|
| Anomaly                | Long leg |                | Short leg |                | Long-Short |                |
|                        | $b$      | $t$ -Statistic | $b$       | $t$ -Statistic | $b$        | $t$ -Statistic |
| BM                     | 0.36     | (2.57)         | -0.12     | (-1.41)        | 0.49       | (2.47)         |
| AM                     | 0.37     | (2.51)         | -0.13     | (-1.55)        | 0.50       | (2.52)         |
| REV                    | 0.47     | (3.03)         | -0.18     | (-1.68)        | 0.65       | (3.21)         |
| EP                     | 0.20     | (1.65)         | -0.01     | (-0.13)        | 0.22       | (1.12)         |
| EFP                    | 0.23     | (2.17)         | -0.08     | (-0.74)        | 0.31       | (1.74)         |
| CP                     | 0.25     | (1.77)         | 0.15      | (1.10)         | 0.10       | (0.48)         |
| DP                     | 0.26     | (2.04)         | -0.04     | (-0.41)        | 0.30       | (1.62)         |
| OP                     | 0.28     | (2.61)         | 0.02      | (0.13)         | 0.26       | (1.32)         |
| NOP                    | 0.26     | (2.42)         | 0.15      | (1.41)         | 0.12       | (0.78)         |
| SG                     | 0.11     | (0.92)         | -0.18     | (-1.66)        | 0.29       | (1.67)         |
| LTG                    | 0.17     | (1.19)         | -0.17     | (-1.07)        | 0.34       | (1.36)         |
| DUR                    | 0.15     | (1.18)         | -0.02     | (-0.14)        | 0.16       | (0.92)         |
| Comb                   | 0.26     | (3.13)         | -0.05     | (-0.61)        | 0.31       | (2.32)         |
